# Supplementary material for: Self-Reported Dietary Choices and Oral Health Care Needs during COVID-19 Quarantine: A Cross-Sectional Study
Source: MDPI journal article supplement (doi:10.3390/nu14020313), 2022-01-13
Supplement: s1 [file s1]

The study is carried out solely for scientific purposes by: Poznan University of Medical Sciences, Uniwersytet Medyczny im. Karola Marcinkowskiego w Poznaniu

PLEASE GIVE BACK THIS QUESTIONNAIRE TO VOLONTEER!!!! THANK YOU!!!!

Table S1: Self-designed questionnaire.

|    |                                                                                                                             |                                                                                                                                                                                                                                                                                                                                                                                                                                                                                                                                                                                                                               |                                                                  |
|----|-----------------------------------------------------------------------------------------------------------------------------|-------------------------------------------------------------------------------------------------------------------------------------------------------------------------------------------------------------------------------------------------------------------------------------------------------------------------------------------------------------------------------------------------------------------------------------------------------------------------------------------------------------------------------------------------------------------------------------------------------------------------------|------------------------------------------------------------------|
| 1  | <b>Did you suffer from COVID-19 in 2020/2021?</b>                                                                           | <input type="checkbox"/> YES                                                                                                                                                                                                                                                                                                                                                                                                                                                                                                                                                                                                  | <input type="checkbox"/> NO                                      |
| 2  | <b>Have you been sent to quarantine in 2020/2021?</b>                                                                       | <input type="checkbox"/> YES                                                                                                                                                                                                                                                                                                                                                                                                                                                                                                                                                                                                  | <input type="checkbox"/> NO                                      |
| 3  | <b><i>Did you work remotely due to pandemic reasons in 2020/2021?</i></b>                                                   | <input type="checkbox"/> YES                                                                                                                                                                                                                                                                                                                                                                                                                                                                                                                                                                                                  | <input type="checkbox"/> NO                                      |
| 4  | <b>Did you have any dental appointment in 2020/2021?</b>                                                                    | <input type="checkbox"/> YES                                                                                                                                                                                                                                                                                                                                                                                                                                                                                                                                                                                                  | <input type="checkbox"/> NO                                      |
| 5  | <b>How many dental visits did you have in 2020/2021?</b>                                                                    | 0 <input type="checkbox"/> teledentistry                                                                                                                                                                                                                                                                                                                                                                                                                                                                                                                                                                                      | 1 2 3 4 <input type="checkbox"/> more                            |
| 6  | <b>Were you afraid of a dental visit from epidemic reasons in 2020/2021?</b>                                                | <input type="checkbox"/> YES                                                                                                                                                                                                                                                                                                                                                                                                                                                                                                                                                                                                  | <input type="checkbox"/> NO                                      |
| 7  | <b>What were the reasons for a dental visit in 2020/2021?</b><br>(you can choose more than 1 answer if needed)              | <input type="checkbox"/> NO<br><br><input type="checkbox"/> toothache<br><br><input type="checkbox"/> gingivitis (pain/bleeding/swelling of gums)<br><br><input type="checkbox"/> dental examination (routine and non-invasive)<br><br><input type="checkbox"/> continuation of dental treatment<br><br><input type="checkbox"/> conservative treatment<br><br><input type="checkbox"/> surgical treatment<br><br><input type="checkbox"/> prosthetic treatment<br><br><input type="checkbox"/> orthodontic treatment<br><br><input type="checkbox"/> oral/tooth trauma<br><br><input type="checkbox"/> oral mucosa treatment |                                                                  |
| 8  | <b>Was there any problem with arranging a dental appointment due to the pandemic?</b>                                       | <input type="checkbox"/> YES                                                                                                                                                                                                                                                                                                                                                                                                                                                                                                                                                                                                  | <input type="checkbox"/> NO                                      |
| 9  | <b>Did you postpone your dental appointment because of the pandemic?</b>                                                    | <input type="checkbox"/> YES                                                                                                                                                                                                                                                                                                                                                                                                                                                                                                                                                                                                  | <input type="checkbox"/> NO                                      |
| 10 | <b>Do you <u>currently</u> have complaints in mouth?</b><br><b><i>(whether you have any complaints in oral cavity?)</i></b> | <input type="checkbox"/> toothache <input type="checkbox"/> YES <input type="checkbox"/> NO<br><input type="checkbox"/> gums bleeding <input type="checkbox"/> YES <input type="checkbox"/> NO<br><input type="checkbox"/> stains/calculus <input type="checkbox"/> YES <input type="checkbox"/> NO<br><input type="checkbox"/> lost of filling <input type="checkbox"/> YES <input type="checkbox"/> NO<br><input type="checkbox"/> tooth hypersensitivity <input type="checkbox"/> YES <input type="checkbox"/> NO                                                                                                          |                                                                  |
| 11 | <b>Are you currently concerned about a dental visit due to the pandemic?</b>                                                | <input type="checkbox"/> YES                                                                                                                                                                                                                                                                                                                                                                                                                                                                                                                                                                                                  | <input type="checkbox"/> NO                                      |
| 12 | <b>Has the frequency of your meals increased daily?</b>                                                                     | <input type="checkbox"/> NO                                                                                                                                                                                                                                                                                                                                                                                                                                                                                                                                                                                                   | x2 x3 x4 >5                                                      |
| 13 | <b>Has the amount of consumed sweets/ sweet snacks increased per day?</b>                                                   | <input type="checkbox"/> NO                                                                                                                                                                                                                                                                                                                                                                                                                                                                                                                                                                                                   | x2 x3 x4 >5                                                      |
| 14 | <b>Has the frequency of drinking a certain drink increased in 2020/2021? Whose?</b>                                         | <input type="checkbox"/> YES                                                                                                                                                                                                                                                                                                                                                                                                                                                                                                                                                                                                  | <input type="checkbox"/> whose?..... <input type="checkbox"/> NO |
| 15 | <b>Do you sweeten hot drinks with sugar?</b>                                                                                | <input type="checkbox"/> YES                                                                                                                                                                                                                                                                                                                                                                                                                                                                                                                                                                                                  | <input type="checkbox"/> NO                                      |
| 16 | <b>What is the time of the last meal in the evening</b>                                                                     | 18:00                                                                                                                                                                                                                                                                                                                                                                                                                                                                                                                                                                                                                         | 20:00 22:00 24:00                                                |

The study is carried out solely for scientific purposes by: Poznan University of Medical Sciences, Uniwersytet Medyczny im. Karola Marcinkowskiego w Poznaniu

PLEASE GIVE BACK THIS QUESTIONNAIRE TO VOLONTEER!!!! THANK YOU!!!!

|    |                                                                                                   |                                                                                                                                                                                                                                                                                           |
|----|---------------------------------------------------------------------------------------------------|-------------------------------------------------------------------------------------------------------------------------------------------------------------------------------------------------------------------------------------------------------------------------------------------|
|    | <b>before bedtime?</b>                                                                            |                                                                                                                                                                                                                                                                                           |
| 17 | <b>Do you smoke cigarettes? How many times a day?</b>                                             | <input type="checkbox"/> NO <input type="checkbox"/> YES, SMOKE < packet a day<br><input type="checkbox"/> YES, SMOKE > packet a day                                                                                                                                                      |
| 18 | <b>How often do you drink alcohol?</b>                                                            | <input type="checkbox"/> each day<br><input type="checkbox"/> several times a week<br><input type="checkbox"/> 1x week<br><input type="checkbox"/> occasionally (only special occasions, e.g. birthdays, holidays)<br><input type="checkbox"/> I don't drink at all                       |
| 19 | <b>Please write the NAME of the most frequently used toothpaste?</b>                              | .....                                                                                                                                                                                                                                                                                     |
| 20 | <b>How long do you brush your teeth usually?</b>                                                  | 0,5min      1min      2min      3min      >                                                                                                                                                                                                                                               |
| 21 | <b>How many Times do you brush your teeth?</b>                                                    | 0      1x      2x      3x      4x                                                                                                                                                                                                                                                         |
| 22 | <b>What type of toothbrush do you use usually?</b>                                                | <input type="checkbox"/> manual <input type="checkbox"/> electric <input type="checkbox"/> sonic<br><input type="checkbox"/> both (manual and other)                                                                                                                                      |
| 23 | <b>How often do you replace for new toothbrush?</b>                                               | each 2months      each 3ms<br>each 6ms      1 a year                                                                                                                                                                                                                                      |
| 24 | <b>During the pandemic, have you noticed a change in your oral hygiene?</b>                       | <input type="checkbox"/> NO changes<br><input type="checkbox"/> YES, I cared for oral hygiene more than before<br><input type="checkbox"/> YES, I cared for oral hygiene worse than before                                                                                                |
| 25 | <b>Do you use dental floss? How many times a day?</b>                                             | <input type="checkbox"/> NO, I do not use<br><input type="checkbox"/> 1x day<br><input type="checkbox"/> 2x day<br><input type="checkbox"/> after each meal                                                                                                                               |
| 26 | <b>Do you use oral mouthwash? Please indicate the NAME of the most frequently used mouthwash?</b> | <input type="checkbox"/> NO, I do not use<br><input type="checkbox"/> YES, I use :.....                                                                                                                                                                                                   |
| 27 | <b>Have you changed the frequency of using mouth rinse during the pandemic?</b>                   | <input type="checkbox"/> NO changes<br><input type="checkbox"/> YES, I rinse more than before<br><input type="checkbox"/> YES, I rinse less frequent than before                                                                                                                          |
| 28 | <b>Do you have to use dentures? Which one (please indicate)</b>                                   | <input type="checkbox"/> YES <input type="checkbox"/> NO<br><input type="checkbox"/> crowns, bridges<br><input type="checkbox"/> removable dentures: e.g. acrylic, metallic alloys<br><input type="checkbox"/> implants                                                                   |
| 29 | <b>How many years do you use this prosthesis?</b>                                                 | <input type="checkbox"/> NO have <input type="checkbox"/> new <input type="checkbox"/> older how many years?.....                                                                                                                                                                         |
| 30 | <b>Does the prosthesis cause any discomfort (please read and choose examples)?</b>                | <input type="checkbox"/> N/A <input type="checkbox"/> NO <input type="checkbox"/> tightness in the mouth<br><input type="checkbox"/> pain <input type="checkbox"/> difficulty in eating<br><input type="checkbox"/> difficulty in speaking <input type="checkbox"/> lack of stabilization |
| 31 | <b>For this reason, in 2020/2021 were you forced to correct the prosthesis yourself?</b>          | <input type="checkbox"/> YES <input type="checkbox"/> NO                                                                                                                                                                                                                                  |
| 32 | <b>Age (years)</b>                                                                                |                                                                                                                                                                                                                                                                                           |
| 33 | <b>Height (cm)</b>                                                                                |                                                                                                                                                                                                                                                                                           |
| 34 | <b>Body mass (kg)</b>                                                                             |                                                                                                                                                                                                                                                                                           |
| 35 | <b>Graduated Education</b>                                                                        | <input type="checkbox"/> Primary <input type="checkbox"/> Secondary<br><input type="checkbox"/> Vocational <input type="checkbox"/> Higher                                                                                                                                                |
| 36 | <b>Sex</b>                                                                                        | <input type="checkbox"/> MAN <input type="checkbox"/> WOMAN                                                                                                                                                                                                                               |
